# Supplementary material for: Integrated Clinical, Molecular and Immunological Characterization of Pulmonary Sarcomatoid Carcinomas Reveals an Immune Escape Mechanism That May Influence Therapeutic Strategies
Source: MDPI journal article supplement (doi:10.3390/ijms241310558), 2023-06-23
Supplement: s1 [file s1]

**Supplementary Figure S1. Proportion of PD-L1 Expression in Patients with Targetable Genomic Alterations**

| PD-L1 TPS                |     | TPS < 1% |    | TPS 1 - 49 % |     | TPS ≥ 50% |    |
|--------------------------|-----|----------|----|--------------|-----|-----------|----|
|                          | all | n        | %  | n            | %   | n         | %  |
| EGFR (p.L858R; p.E709K)  | 2   | 0        | 0  | 2            | 100 | 0         | 0  |
| KRAS G12C                | 25  | 3        | 12 | 3            | 12  | 19        | 76 |
| MET Ex14skip             | 24  | 6        | 25 | 6            | 25  | 12        | 50 |
| BRAF V600E               | 2   | 0        | 0  | 1            | 50  | 1         | 50 |
| CCDC6-RET fusion         | 3   | 0        | 0  | 2            | 67  | 1         | 33 |
| EML4-Alk (E13A20) fusion | 2   | 1        | 50 | 0            | 0   | 1         | 50 |
