# Supplementary material for: Integrated Clinical, Molecular and Immunological Characterization of Pulmonary Sarcomatoid Carcinomas Reveals an Immune Escape Mechanism That May Influence Therapeutic Strategies
Source: MDPI journal article supplement (doi:10.3390/ijms241310558), 2023-06-23
Supplement: s1 [file s1]

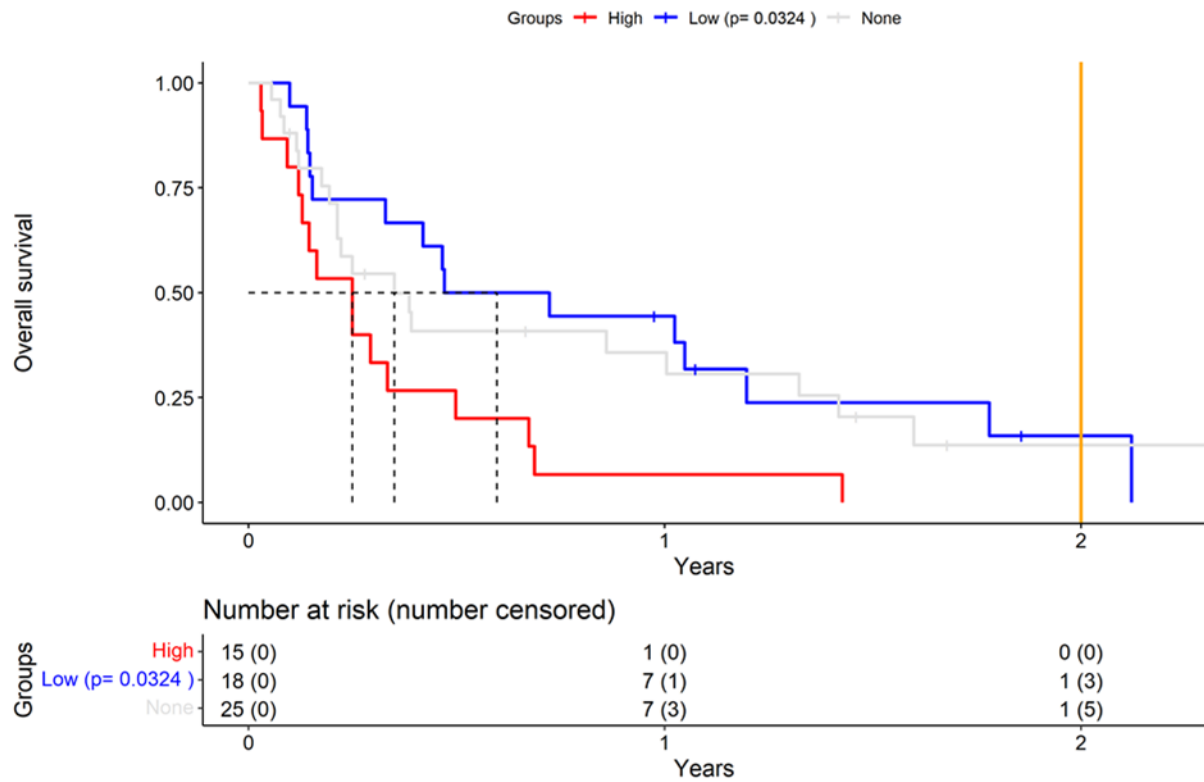

**Supplementary Figure S2.** Kaplan-Meier plots displaying correlations of processing mutations to OS in the sarcomatoid NSCLC cohort. Only patients with advanced-stage tumour disease (IIIB-IV) were included. A high mutation count constitutes more than one mutation, while low is equivalent to just one mutation. Dotted lines represent the medial OS of each group. The p-value was calculated by score-logrank test.
