# Supplementary material for: Integrated Clinical, Molecular and Immunological Characterization of Pulmonary Sarcomatoid Carcinomas Reveals an Immune Escape Mechanism That May Influence Therapeutic Strategies
Source: MDPI journal article supplement (doi:10.3390/ijms241310558), 2023-06-23

**Supplementary Figure S3.** Patients who have received ICI show better overall survival when no or few processing mutations are present compared to patients who have many processing mutations ( $p < 0.05$ ). Though, these results should be interpreted with caution, as of the 10 patients treated with ICI, only four patients received monotherapies with pembrolizumab. **3A.** Entire cohort, stage I-IV. **3B.** Advanced stages IIIB-IV only.

**S3A.**

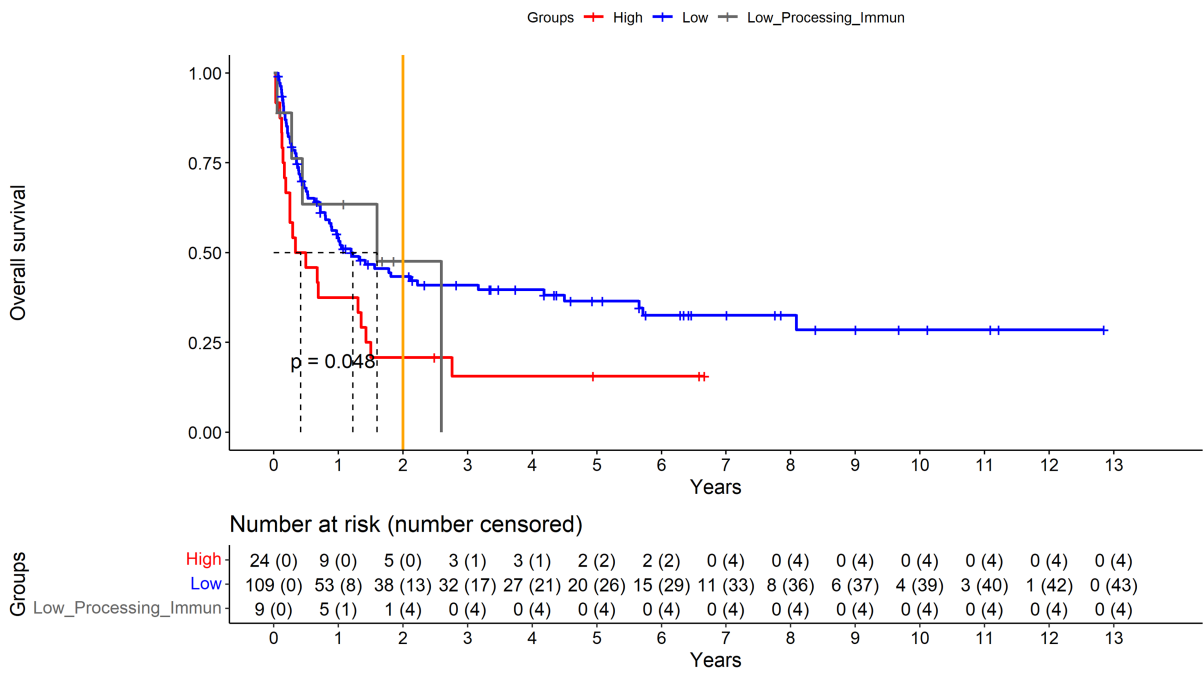

**S3B.**

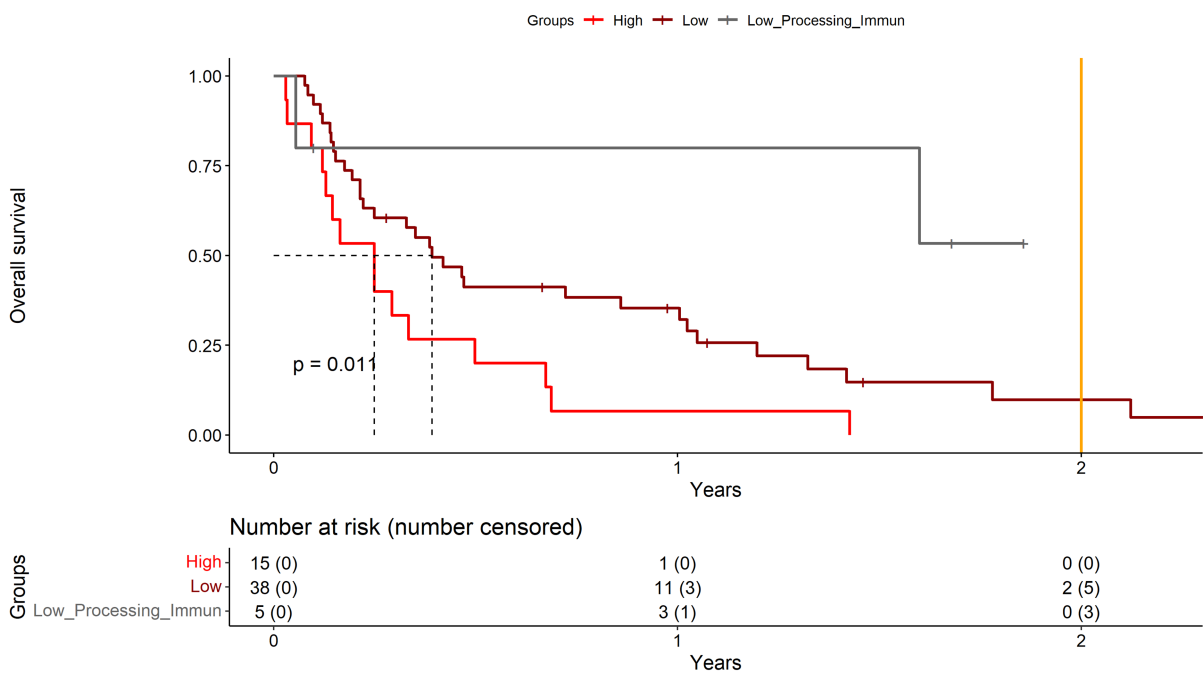

Supplement: s1 [file s1]
