# Supplementary material for: Integrated Clinical, Molecular and Immunological Characterization of Pulmonary Sarcomatoid Carcinomas Reveals an Immune Escape Mechanism That May Influence Therapeutic Strategies
Source: MDPI journal article supplement (doi:10.3390/ijms241310558), 2023-06-23
Supplement: s1 [file s1]

ACTG2-ALK.A2A18  
AKAP9-BRAF.A8B9.COSF1013.1  
B4GALT1-RAF1.B1R8  
BAG4-FGFR1.B2F6  
CCDC6-RET.C1R12.COSF1271  
CD74-ROS1.C6R32.COSF1202  
CD74-ROS1.C6R34.COSF1200  
CDC27-BRAF.C16B9.1  
CEP85L-ROS1.C8R36  
CUX1-RET.C10R12  
EGFR-EGFR.E1E8.DelPositive.1  
EML1-ABL1.E17A2  
EML4-ALK.E13A20.AB462411  
EML4-ALK.E18A20.COSF487.1  
EML4-ALK.E20A20.COSF409.1  
EML4-ALK.E2A20.COSF478.1  
EML4-ALK.E6A17  
EML4-ALK.E6A18  
EML4-ALK.E6A19.COSF1296.1  
EML4-ALK.E6aA20.AB374361  
ERC1\_ELKS-RET.E11R12.COSF1508  
ERC1-RET.E12R12  
ERC1-RET.E17R12  
ERC1-RET.E7R12  
ERLIN2-FGFR1.E8F2  
ESRP1-RAF1.E13R6.COSF826  
ETV6-NTRK3.E4N15.COSF823.1  
ETV6-NTRK3.E5N15.COSF571.1  
EZR-ROS1.E10R34.COSF1267  
FAM131B-BRAF.F2B9.COSF1189.1  
FCHSD1-BRAF.F13B9.COSF404.1  
FGFR2-BICC1.F17B2  
FGFR2-CASP7.F17C2  
FGFR2-CIT.F17C23  
FGFR2-KIAA1967\_CCAR2.F17C4  
FGFR2-OFD1.F17O3  
FGFR3-BAIAP2L1.F17B2.COSF1347  
FGFR3-TACC3.F15T11  
FGFR3-TACC3.F16T10.COSF1359  
FGFR3-TACC3.F16T11.COSF1348  
FGFR3-TACC3.F17T10.COSF1434  
FGFR3-TACC3.F17T11  
FGFR3-TACC3.F17T5  
FGFR3-TACC3.F17T6  
FGFR3-TACC3.F17T8  
FGFR3-TACC3.F17T9  
FKBP15-RET.F25R12  
GOLGA5-RET.G7R12

GOPC-ROS1.G4R36.COSF1188  
GOPC-ROS1.G8R35.COSF1139  
GTF2IRD1-ALK.G7A20  
HIP1-ALK.H21A20  
HIP1-ALK.H28A20  
HOOK3-RET.H11R12  
KIAA1468-RET.K10R12  
KIAA1549-BRAF.K16B10.COSF509  
KIAA1549-BRAF.K17B10  
KIAA1549-BRAF.K18B9  
KIF5B-ALK.K15A20.COSF1381  
KIF5B-ALK.K17A20.COSF1257  
KIF5B-ALK.K24A20.COSF1058  
KIF5B-RET.K15R12.COSF1232  
KIF5B-RET.K16R12.COSF1230  
KIF5B-RET.K22R12.COSF1253  
KIF5B-RET.K23R12.COSF1234  
KIF5B-RET.K24R11.COSF1262  
KIF5B-RET.K24R8.COSF1236  
KLC1-ALK.K9A20.COSF1276  
LRIG3-ROS1.L16R35.COSF1269  
MEMO1-ALK.M2A7  
MPRIIP-NTRK1.M14N12  
MPRIIP-NTRK1.M18N12  
MPRIIP-NTRK1.M21N12  
NCOA4-RET.N7R12  
PAPSS1-BRAF.P5B9.1  
PAX8-PPARG.P10P2.COSF1219  
PAX8-PPARG.P7P2.COSF1223  
PAX8-PPARG.P8P2.COSF1215  
PAX8-PPARG.P9P2.COSF1217  
PCM1-RET.P29R12  
PRKAR1A-RET.P7R12  
SCAF11-PDGFR.A.S1P2  
SDC4-ROS1.S2R32.COSF1265  
SDC4-ROS1.S2R34  
SDC4-ROS1.S4R32.COSF1278  
SDC4-ROS1.S4R34.COSF1280  
SLC34A2-ROS1.S4R32.COSF1197  
SLC34A2-ROS1.S4R34.COSF1198  
SLC45A3-BRAF.S1B8.COSF871  
SLC45A3-ERG.S1E4.COSF1138  
SLC45A3-FGFR2.S1F1  
SLC45A3-FGFR2.S1F2  
SND1-BRAF.S16B9.1  
SQSTM1-NTRK1.S5N10  
SSBP2-NTRK1.S12N12  
STRN-ALK.S3A20.COSF1430

TBL1XR1-RET.T9R12  
TFG-ALK.T4A20.COSF424  
TFG-ALK.T5A20.COSF426  
TFG-ALK.T6A20.COSF428  
TFG-NTRK1.T6N10  
TMPRSS2-ERG.T1E2.COSF23.1  
TMPRSS2-ERG.T1E3.COSF24  
TMPRSS2-ERG.T1E4.COSF38  
TMPRSS2-ERG.T1E5.COSF26  
TMPRSS2-ERG.T1E6.COSF36  
TMPRSS2-ERG.T1EIIIc\_4  
TMPRSS2-ERG.T2E2.COSF27.1  
TMPRSS2-ERG.T2E4.COSF28  
TMPRSS2-ERG.T2EIIIc\_4  
TMPRSS2-ERG.T2E5.COSF29  
TMPRSS2-ERG.T3E4.COSF30  
TMPRSS2-ERG.T4E4.COSF18  
TMPRSS2-ERG.T4E5.COSF17  
TMPRSS2-ERG.T5E4.COSF16  
TMPRSS2-ERG.T5E5  
TMPRSS2-ETV1.T1E5  
TMPRSS2-ETV1.T2E5  
TMPRSS2-ETV1.T1E4  
TMPRSS2-ETV5.T1E2.EU314929  
TMPRSS2-ETV5.T3E2.EU314930  
TPM1-ALK.T8A20.NGS  
TPM3-ALK.T7A20  
TPM3-NTRK1.T7N10.COSF1318  
TPR-ALK.T15A20  
TPR-NTRK1.T21N10  
TRIM24-BRAF.T9B9.1  
TRIM27-RET.T3R12  
TRIM33-RET.T16R12  
VCL-ALK.V16A20.COSF1057  
WIPF2-ERBB2.W1E4  
HMBS.ENCTRL.E8E9  
TBP.ENCTRL.E3E4  
MYC.ENCTRL.E2E3  
ALK.5p\_NM\_004304.4.e5e6  
ALK.3p\_NM\_004304.4.e23e24  
RET.5p\_NM\_020975.4.e6e7  
RET.3p\_NM\_020975.4.e18e19  
ROS1.5p\_NM\_002944.2.e11e12  
ROS1.3p\_NM\_002944.2.e38e39  
NTRK1.5p.eNST00000392302.e2e3  
NTRK1.3p.eNST00000392302.e17e18  
A2M-ALK.A22A19  
ACBD5-RET.A11R12

AFAP1-NTRK2.A14N12  
AFAP1-RET.A3R12  
AGBL4-NTRK2.A6N16  
AKAP13-RET.A35R12  
ATIC-ALK.A7A20  
BAG4-FGFR1.B1F8  
BAIAP2L1-MET.B9M15  
BCAN-NTRK1.B13N11  
BTBD1-NTRK3.B4N14  
C8orf34-MET.C2M15  
CAPZA2-MET.C4M11  
CARS-ALK.C17A20  
CLTC-ALK.C31A20  
COX5A-NTRK3.C1N15  
CLTC-ROS1.C31R35  
DCTN1-ALK.D26A20  
EML4-ALK.E21A20  
ERC1-ROS1.E11R36  
ETV6-NTRK3.E4N14  
ETV6-NTRK3.E5N14  
FGFR1-TACC1.F17T7  
FGFR2-MGEA5.F17M12  
FGFR2-TACC3.F17T11  
FGFR3-AES.F17A2  
FGFR3-ELAVL3.F17E2  
HLA\_A-ROS1.H7R34  
KIAA1598-ROS1.K11R36  
LMNA-NTRK1.L2N11  
MET-MET.M13M15  
MYO5A-ROS1.M23R35  
NACC2-NTRK2.N4N13  
NCOA4\_ELE1-RET.E6R12  
NFASC-NTRK1.N20N10  
OXR1-MET.O9M13  
PPFIBP1-ROS1.P9R35  
PTPRZ1-MET.P1M2  
PTPRZ1-MET.P3M2  
PTPRZ1-MET.P8M2  
PWWP2A-ROS1.P1R36  
QKI-NTRK2.Q6N16  
RANBP2-ALK.R18A20  
RNF213-NTRK1.R15N12  
SEC31L1\_SEC31A-ALK.S21A20  
SEC31L1\_SEC31A-ALK.S22A20  
SPECC1L-RET.S10R12  
SQSTM1-NTRK2.S5N17  
TFG-MET.T5M15  
TPM3-ROS1.T3R36

TPR-MET.T4M15  
TRAF1-ALK.T6A20  
TRIM24-NTRK2.T12N15  
VCL-NTRK2.V16N12  
ZCCHC8-ROS1.Z2R36  
KTN1-RET.K29R12.COSF1513  
TPM4-ALK.T7A20  
CD74-NTRK1.C7N10  
TFG-ROS1.T4R35  
CD74-ROS1.C6R35  
KIAA1549-BRAF.K15B9  
KIAA1549-BRAF.K15B11  
EZR-ROS1.E10R35  
MSN-ROS1.M9R34  
RUFY2-RET.R9R12  
LRP1.ENCTRL.E57E58  
CCDC6-ROS1.C5R35  
MAGI3-AKT3.M10A3  
C2orf44-ALK.C4A20  
CD74-ROS1.C4R33.NGS  
EML4-ALK.E13A20.COSF1062.2  
EML4-ALK.E14A20.COSF1064.1  
EML4-ALK.E14A20.COSF477.1  
EML4-ALK.E17A20.COSF1366.2  
EML4-ALK.E17A20.COSF1367.2  
EML4-ALK.E20A20.COSF730.1  
EML4-ALK.E2A20.COSF479.1  
EML4-ALK.E6bA20.AB374362  
EML4-ALK.E7A20.NGS  
FGFR2-AFF3.F17A8.1  
FGFR3-TACC3.F17T13.NGS  
FGFR3-TACC3.F18T7.NGS  
KDEL2-ROS1.K5R35  
KIF5B-ALK.K15A20.COSF1060.1  
KIF5B-RET.K15R11.COSF1255.1  
NCOA1-ALK.N21A1.NGS  
SLC34A2-ROS1.S13R32.COSF1259  
SLC34A2-ROS1.S13R34.COSF1261  
SLC34A2-ROS1.S13R36  
SPECC1L-RET.S10R11.NGS.1  
TAX1BP1-BRAF.T8B11.1  
TBL1XR1-RET.T9R11.NGS.1  
TMPRSS2-ETV1.T1bE4  
TMPRSS2-ETV4.T1bE3  
TMPRSS2-ETV5.T1bE2  
TPM3-ROS1.T7R35.COSF1273  
TRIM24-RET.T9R12  
ITGB7.ENCTRL.E14E15

AKAP13-RET.A36R12  
CCDC6-RET.C1R13  
CCDC6-RET.C2R12  
CCDC6-RET.C8R11  
CCDC6-RET.C8R12  
CLIP1-ROS1.C19R36  
EML4-ALK.E3p53insA20  
FGFR3-TACC3.F14T11  
FGFR3-TACC3.F18T4and5  
FGFR3-TACC3.F18T10.1  
FGFR3-TACC3.F18T10  
FGFR3-TACC3.F18T11  
FGFR3-TACC3.TruncatedF17T4  
SMEK2-ALK.S9A2  
AGTRAP-BRAF.A5B8.COSF828.1  
AXL-MBIP.A20M4.1  
CEL-NTRK1.C7N7.1  
EML4-ALK.E15A20.COSF413.1  
IRF2BP2-NTRK1.I1N10.1  
NTRK1-DYNC2H1.N17D85  
PRKAR1A-ALK.P2A20.NGS.1  
ALK-PTPN3.A11P3  
TPR-NTRK1.T6N12.short  
TPR-NTRK1.T6N12.1  
EML4-ALK.E6ins18A20  
EML4-ALK.E13ins90A20  
EML4-ALK.E14ins2del52A20  
EML4-ALK.E14ins124A20  
EML4-ALK.E14del36A20  
EML4-ALK.E17ins65A20  
EML4-ALK.E17ins68A20  
EML4-ALK.E17ins30A20\_V8a  
TPR-NTRK1.T21N9  
CCDC6-RET.C1R12  
CCDC6-RET.C1R11  
CCDC6-RET.C1R11.1  
FGFR3-TACC3.F17T7  
FGFR3-TACC3.F17T10  
FGFR3-TACC3.F17T11.1  
FGFR3-TACC3.F17T11.2  
CLIP4-ALK.C12A23  
FGFR3-TACC3.F17intron17T4  
KDEL2-ROS1.K5Rintron34  
FGFR3-TACC3.F17Intron17T9
